# Supplementary material
Source: Elsevier journal article supplement (https://comptes-rendus.academie-sciences.fr/geoscience/article/10.1016/j.crte.2007.09.019/file/attach/mmc1.pdf)
Supplement: mmc1 [file mmc1.pdf]

| ALLERET, 7m |         |        |        |        |        |         |         |       |       |         |         |      |      |             |          |           |                       |
|-------------|---------|--------|--------|--------|--------|---------|---------|-------|-------|---------|---------|------|------|-------------|----------|-----------|-----------------------|
| Run         | Ech.    | Ar40   | ± 1σ   | Ar39   | ± 1σ   | Ar38    | ± 1σ    | Ar37  | ± 1σ  | Ar36    | ± 1σ    | %Rad | ± 1σ | Ar39, Moles | Age (ka) | ± 1σ (ka) | Age ka (FCs at 28.21) |
| 57113-01    | Alleret | 2.0468 | 0.0032 | 0.4197 | 0.0011 | 0.00554 | 0.00006 | 0.057 | 0.002 | 0.00350 | 0.00003 | 49.7 | 0.4  | 5.32E-15    | 590.1    | 7.9       | 594.1                 |
| 57113-02    | Alleret | 0.6931 | 0.0018 | 0.1976 | 0.0005 | 0.00249 | 0.00004 | 0.020 | 0.002 | 0.00081 | 0.00002 | 65.5 | 0.9  | 2.51E-15    | 559.9    | 8.3       | 563.7                 |
| 57113-03    | Alleret | 1.1976 | 0.0025 | 0.2578 | 0.0008 | 0.00346 | 0.00005 | 0.024 | 0.002 | 0.00196 | 0.00002 | 51.8 | 0.6  | 3.27E-15    | 586.6    | 8.7       | 590.5                 |
| 57113-04    | Alleret | 5.4678 | 0.0044 | 0.4418 | 0.0008 | 0.00809 | 0.00007 | 0.049 | 0.003 | 0.01497 | 0.00004 | 19.1 | 0.2  | 5.60E-15    | 578.0    | 21.7      | 581.9                 |
| 57113-05    | Alleret | 0.9676 | 0.0021 | 0.3266 | 0.0008 | 0.00379 | 0.00005 | 0.041 | 0.003 | 0.00073 | 0.00003 | 77.9 | 0.9  | 4.14E-15    | 562.5    | 6.9       | 566.3                 |
| 57113-06    | Alleret | 0.5715 | 0.0015 | 0.1217 | 0.0003 | 0.00164 | 0.00003 | 0.014 | 0.002 | 0.00101 | 0.00002 | 48.1 | 1.1  | 1.54E-15    | 550.0    | 13.6      | 553.7                 |
| 57113-07    | Alleret | 1.4699 | 0.0028 | 0.4899 | 0.0012 | 0.00591 | 0.00005 | 0.065 | 0.003 | 0.00123 | 0.00002 | 75.6 | 0.5  | 6.21E-15    | 552.8    | 4.4       | 556.5                 |
| 57113-08    | Alleret | 1.0445 | 0.0023 | 0.2353 | 0.0007 | 0.00290 | 0.00004 | 0.022 | 0.002 | 0.00144 | 0.00002 | 59.4 | 0.6  | 2.98E-15    | 642.8    | 8.5       | 647.1                 |
| 57113-09    | Alleret | 0.8572 | 0.0020 | 0.2580 | 0.0005 | 0.00311 | 0.00004 | 0.041 | 0.002 | 0.00093 | 0.00002 | 68.1 | 0.7  | 3.27E-15    | 551.6    | 6.7       | 555.3                 |
| 57113-10    | Alleret | 0.4937 | 0.0012 | 0.1537 | 0.0004 | 0.00190 | 0.00003 | 0.011 | 0.002 | 0.00048 | 0.00002 | 71.5 | 1.1  | 1.95E-15    | 559.5    | 8.9       | 563.2                 |
| 57113-11    | Alleret | 0.5696 | 0.0017 | 0.1717 | 0.0006 | 0.00206 | 0.00004 | 0.019 | 0.002 | 0.00061 | 0.00002 | 68.8 | 1.0  | 2.18E-15    | 555.8    | 8.7       | 559.5                 |
| 57113-12    | Alleret | 0.5009 | 0.0018 | 0.1725 | 0.0007 | 0.00208 | 0.00004 | 0.022 | 0.002 | 0.00038 | 0.00002 | 78.2 | 1.1  | 2.19E-15    | 553.3    | 8.1       | 557.0                 |
| 57113-13    | Alleret | 0.5878 | 0.0091 | 0.1580 | 0.0004 | 0.00197 | 0.00003 | 0.020 | 0.002 | 0.00052 | 0.00002 | 74.2 | 2.3  | 2.00E-15    | 672.0    | 18.4      | 676.5                 |
| 57113-14    | Alleret | 0.4938 | 0.0016 | 0.1496 | 0.0005 | 0.00187 | 0.00003 | 0.021 | 0.002 | 0.00053 | 0.00002 | 68.4 | 1.1  | 1.90E-15    | 550.2    | 9.1       | 553.9                 |
| 57113-15    | Alleret | 0.6218 | 0.0015 | 0.1575 | 0.0004 | 0.00199 | 0.00004 | 0.013 | 0.002 | 0.00091 | 0.00002 | 56.9 | 0.9  | 2.00E-15    | 547.5    | 9.7       | 551.2                 |
| 57113-16    | Alleret | 0.7121 | 0.0017 | 0.1850 | 0.0005 | 0.00240 | 0.00004 | 0.020 | 0.002 | 0.00089 | 0.00002 | 63.4 | 0.8  | 2.35E-15    | 594.4    | 8.7       | 598.4                 |
| 57113-17    | Alleret | 1.0738 | 0.0027 | 0.2490 | 0.0008 | 0.00312 | 0.00005 | 0.028 | 0.002 | 0.00164 | 0.00002 | 55.2 | 0.6  | 3.16E-15    | 580.0    | 8.1       | 583.9                 |
| 57113-18    | Alleret | 0.8585 | 0.0017 | 0.2160 | 0.0005 | 0.00270 | 0.00004 | 0.018 | 0.002 | 0.00125 | 0.00002 | 57.2 | 0.7  | 2.74E-15    | 554.3    | 8.1       | 558.0                 |
| 57113-19    | Alleret | 0.8570 | 0.0017 | 0.2431 | 0.0007 | 0.00295 | 0.00004 | 0.024 | 0.003 | 0.00106 | 0.00002 | 63.6 | 0.7  | 3.08E-15    | 546.1    | 6.8       | 549.8                 |
| 57113-20    | Alleret | 0.3170 | 0.0007 | 0.1294 | 0.0003 | 0.00145 | 0.00003 | 0.017 | 0.002 | 0.00010 | 0.00001 | 91.5 | 0.9  | 1.64E-15    | 545.7    | 5.6       | 549.4                 |
| 57113-21    | Alleret | 1.2349 | 0.0022 | 0.0918 | 0.0003 | 0.00168 | 0.00003 | 0.010 | 0.002 | 0.00336 | 0.00002 | 19.6 | 0.6  | 1.16E-15    | 642.0    | 28.8      | 646.3                 |
| 57113-22    | Alleret | 0.3124 | 0.0011 | 0.1230 | 0.0004 | 0.00140 | 0.00004 | 0.016 | 0.002 | 0.00013 | 0.00001 | 88.5 | 1.0  | 1.56E-15    | 547.7    | 6.2       | 551.4                 |
| 57113-23    | Alleret | 0.6171 | 0.0011 | 0.1606 | 0.0006 | 0.00200 | 0.00004 | 0.021 | 0.002 | 0.00084 | 0.00001 | 60.2 | 0.7  | 2.04E-15    | 563.4    | 7.5       | 567.2                 |
| 57113-24    | Alleret | 0.6048 | 0.0012 | 0.2000 | 0.0008 | 0.00240 | 0.00004 | 0.025 | 0.002 | 0.00052 | 0.00001 | 75.1 | 0.6  | 2.54E-15    | 553.6    | 5.6       | 557.3                 |
| 57113-25    | Alleret | 0.4067 | 0.0009 | 0.1570 | 0.0004 | 0.00195 | 0.00004 | 0.016 | 0.002 | 0.00018 | 0.00001 | 87.0 | 0.8  | 1.99E-15    | 549.3    | 5.1       | 553.0                 |
| 57113-26    | Alleret | 0.2575 | 0.0007 | 0.0730 | 0.0003 | 0.00094 | 0.00003 | 0.008 | 0.002 | 0.00028 | 0.00001 | 67.7 | 1.1  | 9.25E-16    | 583.0    | 10.5      | 586.9                 |
| 57113-27    | Alleret | 0.1348 | 0.0005 | 0.0455 | 0.0002 | 0.00057 | 0.00003 | 0.004 | 0.002 | 0.00011 | 0.00001 | 76.8 | 2.0  | 5.77E-16    | 560.0    | 15.1      | 563.8                 |
| 57113-28    | Alleret | 0.5006 | 0.0010 | 0.1243 | 0.0004 | 0.00161 | 0.00004 | 0.013 | 0.002 | 0.00072 | 0.00001 | 57.6 | 0.8  | 1.58E-15    | 569.4    | 9.0       | 573.2                 |
| 57113-29    | Alleret | 0.3031 | 0.0006 | 0.1213 | 0.0003 | 0.00147 | 0.00003 | 0.013 | 0.002 | 0.00010 | 0.00002 | 90.7 | 1.6  | 1.54E-15    | 556.0    | 10.0      | 559.7                 |
| 57113-30    | Alleret | 0.2195 | 0.0006 | 0.0721 | 0.0003 | 0.00083 | 0.00003 | 0.005 | 0.002 | 0.00018 | 0.00001 | 75.4 | 1.2  | 9.15E-16    | 563.8    | 9.5       | 567.6                 |
| 57113-31    | Alleret | 0.3296 | 0.0009 | 0.1128 | 0.0003 | 0.00132 | 0.00003 | 0.009 | 0.002 | 0.00027 | 0.00002 | 76.4 | 1.5  | 1.43E-15    | 548.0    | 10.8      | 551.7                 |
| 57113-32    | Alleret | 0.3257 | 0.0008 | 0.1169 | 0.0003 | 0.00140 | 0.00004 | 0.009 | 0.002 | 0.00021 | 0.00001 | 81.1 | 0.9  | 1.48E-15    | 555.1    | 6.6       | 558.8                 |

| Parameters used                                 |                             |
|-------------------------------------------------|-----------------------------|
| Erreur données à 95%                            |                             |
| J value                                         | 0.0001352 ± 0.00000015      |
| (36/37)Ca                                       | 0.000265 ± 0.0000022        |
| (39/37)Ca                                       | 0.000695 ± 0.00000918       |
| (40/39)k                                        | 0.00297 ± 0.000092          |
| Discrimination                                  | 1.0063 ± 0.002              |
| <b>Atmospheric Argon</b>                        |                             |
| (40Ar/36Ar)atm                                  | 295.5 ± 0.5 (Nier 1950)     |
| (40Ar/38Ar)atm                                  | 1575 ± 2.0 (Nier 1950)      |
| <b>Decay constante (Steiger and Jager 1971)</b> |                             |
| Lambda 40K epsilon                              | 5.810000e-11 ± 1.700000e-12 |
| Lambda 40K Beta                                 | 4.962000e-10 ± 8.600000e-12 |
| Lambda 37Ar                                     | 0.01975 ± 0                 |
| Lambda 39Ar                                     | 7.068000e-6 ± 0             |
| Lambda 36Cl                                     | 6.308000e-9 ± 0             |

|                    |                      |
|--------------------|----------------------|
| <b>Standard</b>    | ACR-2                |
| <b>Age</b>         | 1.193 ± 0.02         |
| <b>Irradiation</b> | 30minutes            |
| <b>where</b>       | CLICIT, Orgeon State |

|                   |    |     |       |     |       |
|-------------------|----|-----|-------|-----|-------|
| Weighted mean age | 23 | 0.7 | 553.5 | 3.0 | 557.2 |
| Median            | 23 | N/A | 553.6 | 5.5 | 557.3 |

| ISOCHRON          |           |      |
|-------------------|-----------|------|
| (ka)              | ± 2σ (ka) | MSWD |
| 551               | 6.0       | 0.6  |
| 40/36 origin ± 2σ |           |      |
| 299.6             | 5.7       |      |
